# Supplementary material for: Vaginal microbiome-hormonal contraceptive interactions associate with the mucosal proteome and HIV acquisition
Source: PLoS Pathog. 2020 Dec 23;16(12):e1009097. doi: 10.1371/journal.ppat.1009097 (PMC7790405; doi:10.1371/journal.ppat.1009097)
Supplement: S11 Table — (XLSX) [file ppat.1009097.s019.xlsx]

## Sheet: Sheet1
S11 Table. Taxa level differences by MPA levels
Taxa	Microbiome Composition (Mean % Bacterial Protein)		Proportion of subjects with above/below median levels of each bacterial taxa				Statistics
	Undetectable/Low MPA	Moderate/High MPA	Undetectable/Low MPA		Moderate/High MPA		OR	LCL	UCL	FET P value	Adjusted P value	FDR Sig
			Below Median	Above Median	Below median	Above Median
Atopobium	0.00528675	0.00312311	0.16996	0.826087	0.126316	0.878947	0.699067	0.38892	1.23271	0.228325	0.502105	ns
Bifidobacterium	0.00616301	0.00403371	0.213439	0.782609	0.121053	0.884211	0.50274	0.281871	0.873934	0.0111689	0.122857	ns
Escherichia	0.00573948	0.000372406	0.027668	0.968379	0.0473684	0.957895	1.72856	0.561021	5.57091	0.311569	0.502105	ns
Fusobacterium	0.00720224	2.62813e-05	0.055336	0.940711	0.0421053	0.963158	0.743657	0.264361	1.94729	0.659823	0.725805	na
Gardnerella	0.21117	0.224042	0.521739	0.474308	0.426316	0.578947	0.670046	0.450098	0.994982	0.0437568	0.19253	ns
Lactobacillus sp.	0.0947053	0.127427	0.474308	0.521739	0.531579	0.473684	1.23385	0.832328	1.83127	0.291993	0.502105	ns
L. crispatus	0.0924838	0.164389	0.521739	0.474308	0.468421	0.536842	0.793649	0.534621	1.17665	0.250008	0.502105	ns
L.iners	0.389251	0.348218	0.466403	0.529644	0.542105	0.463158	1.32829	0.895757	1.9728	0.150655	0.414301	ns
Megasphaera	0.00529194	0.00634025	0.205534	0.790514	0.126316	0.878947	0.553461	0.312165	0.958927	0.0302786	0.166532	ns
Mobiluncus	0.0214816	0.012904	0.249012	0.747036	0.173684	0.831579	0.627237	0.378043	1.02669	0.0621861	0.222511	ns
Peptoniphilus	0.000446582	0	0.0316206	0.964427	0.0210526	0.984211	0.653012	0.14172	2.48189	0.566147	0.655539	ns
Peptostreptococcus	0.000298143	0.000166662	0.0118577	0.98419	0.0210526	0.984211	1.77304	0.296118	12.2514	0.470835	0.621483	ns
Porphyromonas	0.000299515	0	0.0197628	0.976285	0.0105263	0.994737	0.523468	0.049339	3.24013	0.703931	0.737451	ns
Prevotella	0.0377246	0.0243431	0.387352	0.608696	0.305263	0.7	0.685876	0.449946	1.04028	0.070799	0.222511	ns
Rugeria	0.00199992	0	0.0158103	0.980237	0.0263158	0.978947	1.66468	0.352996	8.50906	0.508486	0.621483	ns
Pseudomonas	0.0371129	0.00782507	0.3083	0.687747	0.326316	0.678947	1.07198	0.700686	1.63695	0.757556	0.757556	ns
Ruminococcus	0.0125727	0.00119	0.158103	0.837945	0.121053	0.884211	0.726114	0.398327	1.29813	0.274205	0.502105	ns
Shuttleworthia	0.000979192	0.000666661	0.0513834	0.944664	0.0368421	0.968421	0.699964	0.231581	1.93279	0.497491	0.621483	ns
Sneathia	0.00350217	0.00253509	0.0632411	0.932806	0.0421053	0.963158	0.645426	0.233742	1.64031	0.398722	0.584792	ns
Streptococcus	0.00877921	0.00525718	0.146245	0.849802	0.110526	0.894737	0.718335	0.384244	1.31337	0.319522	0.502105	ns
MPA: Medroxyprogesterone acetate
Undetectable/Low MPA (<≤50 pg/ml-299 pg/ml, n=253)
Moderate/High MPA levels (>300 pg/ml, n=190)
na: no estimate could be calculated
ns: non-significant at FDR=5%
*significant at FDR= 5%
